# Supplementary material for: Preoperative immunochemotherapy for locally advanced non-small cell lung cancer: an analysis of the clinical outcomes, optimal number of cycles, and peripheral immune markers
Source: PubMed Central journal article supplement — Transl Lung Cancer Res. 2022 Dec;11(12):2364–81. doi: 10.21037/tlcr-22-439 (PMC9830256; doi:10.21037/tlcr-22-439), 2022-12
Supplement: tlcr-11-12-2364-dss.pdf [file tlcr-11-12-2364-dss.pdf]

## Data Sharing Statement

|                     |                                                                                                                                                    |                                                                                                                                                                                                    |
|---------------------|----------------------------------------------------------------------------------------------------------------------------------------------------|----------------------------------------------------------------------------------------------------------------------------------------------------------------------------------------------------|
| <b>Article Info</b> | <a href="https://dx.doi.org/10.21037/tlcr-22-439">https://dx.doi.org/10.21037/tlcr-22-439</a>                                                      |                                                                                                                                                                                                    |
| <b>Item</b>         | <b>Question</b>                                                                                                                                    | <b>Authors' Response<br/>(place “-” if not applicable)</b>                                                                                                                                         |
| 1                   | Would you like to share data collected for your study to others?                                                                                   | Yes, I'd like to share data collected for the study.                                                                                                                                               |
| 2                   | If not, would you like to share the reason for your decision?                                                                                      | -                                                                                                                                                                                                  |
| 3                   | What data in particular will be shared?                                                                                                            | Individual participant data that underlie the results reported in this article, after deidentification (text, tables, figures and appendices). And the survival data in particular will be shared, |
| 4                   | Any other documents will be share? Such as study protocol, statistical analysis plan, informed consent form, clinical study report, analytic code. | Statistical analysis plan, informed consent form, and clinical study report will also be shared if requested.                                                                                      |
| 5                   | When will data availability begin?                                                                                                                 | From the publication date.                                                                                                                                                                         |
| 6                   | When will data availability end?                                                                                                                   | Two years within the publication date, since the technique or survival data may be updated over time.                                                                                              |
| 7                   | To whom will you share the data?                                                                                                                   | Investigators whose proposed use of the data has been approved by an independent review committee.                                                                                                 |
| 8                   | For what type of analysis or purpose?                                                                                                              | To achieve aims in the approved proposal.                                                                                                                                                          |
| 9                   | How or where can the data/documents be obtained?                                                                                                   | Proposals should be directed to 756523868@qq.com. To gain access, data requestors will need to sign a data access agreement.                                                                       |
| 10                  | Any other restrictions?                                                                                                                            | We may balance the potential benefits and risks for each request and then provide the data that could be shared.                                                                                   |
